# Supplementary material for: How Initial Representations Shape Coupled Learning Processes
Source: Atypon-hosted journal article supplement (doi:10.1287/orsc.2015.1033), 2016-02-29
Supplement: orsc.2015.1033-sm_technicalappendix.pdf [file orsc.2015.1033-sm_technicalappendix.pdf]

## Appendix

Let  $a_t^{i,j}$  be the attraction of the  $j^{th}$  wrong choice chosen by agent  $i$  in trial  $t$ .  $j$  varies from 1 to  $(m - 1)$ . Let  $A_k^i$  be the attraction of the right choice chosen by agent  $i$  in trial  $t$ .

Let  $PFN_t$  be the probability of a “false negative”,  $PTN_t$  be the probability of a “true negative” and  $PTP_t$  be the probability of a “true positive” in trial  $t$  respectively.

### Proof of Proposition 1:

We need to show

$$PFN_1^{NN} > PFN_1^{BB}, PFN_1^{GB} > PFN_1^{BB} \text{ and}$$

$$PTN_1^{BB} > PTN_1^{NN}, PTN_1^{BB} > PTN_1^{GB}.$$

For the No-No representations (Case 0), the initial attractions of the agents wrong and right choices using Equation 1 are:

$$a_1^{1,j} = a_1^{2,j} = a_1 = A_1 = p\Pi_{max} + (1 - p)\Pi_{min}.$$

Substituting  $\Pi_{max} = \Pi_{min} + \Delta$  and using Equation 2, we calculate

$$PFN_1^{NN} = \frac{2(m-1)}{m^2}, \tag{4}$$

$$PTN_1^{NN} = \left[ \frac{m-1}{m} \right]^2. \tag{5}$$

For the Bad-Bad representations (Case 2), the initial attractions of the agents  $(m - 2)$  wrong choices are

$$a_1^{1,j} = a_1^{2,j} = p\Pi_{min} + (1 - p)\Pi_{max},$$

and for the remaining wrong choice is

$$a_1^{1,j'} = a_1^{2,j'} = p\Pi_{max} + (1 - p)\Pi_{min}.$$

The initial attractions of the agents right choices are

$$A_1^1 = A_1^2 = p\Pi_{min} + (1 - p)\Pi_{max}.$$

Substituting  $\Pi_{max} = \Pi_{min} + \Delta$  and using Equation 2, we calculate

$$PFN_1^{BB} = \frac{2e^{\frac{\Delta}{\tau}} \left( e^{\frac{2p_0\Delta}{\tau}} + (m - 2)e^{\frac{\Delta}{\tau}} \right)}{\left( e^{\frac{2p_0\Delta}{\tau}} + (m - 1)e^{\frac{\Delta}{\tau}} \right)^2},$$

$$PTN_1^{BB} = \frac{\left( e^{\frac{2p_0\Delta}{\tau}} + (m - 2)e^{\frac{\Delta}{\tau}} \right)^2}{\left( e^{\frac{2p_0\Delta}{\tau}} + (m - 1)e^{\frac{\Delta}{\tau}} \right)^2}.$$

For the Good-Bad representations (Case 4), the first agent has a good representation and the second agent has a bad representation. The initial attractions of the first agent's wrong choices are

$$a_1^{1,j} = p\Pi_{min} + (1 - p)\Pi_{max},$$

and for the right choice is

$$A_1^1 = p\Pi_{max} + (1 - p)\Pi_{min}.$$

The initial attractions of the second agent's  $(m - 2)$  wrong choices are

$$a_1^{2,j} = p\Pi_{min} + (1 - p)\Pi_{max},$$

for the remaining wrong choice is

$$a_1^{2,j'} = p\Pi_{max} + (1 - p)\Pi_{min},$$

and for the right choice is

$$A_1^2 = p\Pi_{min} + (1 - p)\Pi_{max}.$$

Substituting  $\Pi_{max} = \Pi_{min} + \Delta$  and using Equation 2, we calculate

$$PFN_1^{GB} = \frac{e^{\frac{4p_0\Delta}{\tau}} + (m-2)e^{\frac{\Delta+2p_0\Delta}{\tau}} + (m-1)e^{\frac{2\Delta}{\tau}}}{\left(e^{\frac{2p_0\Delta}{\tau}} + (m-1)e^{\frac{\Delta}{\tau}}\right)^2},$$

$$PTN_1^{GB} = \frac{(m-1)e^{\frac{\Delta}{\tau}} \left(e^{\frac{2p_0\Delta}{\tau}} + (m-2)e^{\frac{\Delta}{\tau}}\right)}{\left(e^{\frac{2p_0\Delta}{\tau}} + (m-1)e^{\frac{\Delta}{\tau}}\right)^2}.$$

Now,

$$PFN_1^{NN} - PFN_1^{BB} = N_1/D_1$$

$$PFN_1^{GB} - PFN_1^{BB} = N_2/D_1$$

where

$$N_1 = -2 \left( e^{\frac{\Delta}{\tau}} - e^{\frac{2p_0\Delta}{\tau}} \right) \left( (m-1)e^{\frac{2p_0\Delta}{\tau}} + (m^2 - 3m + 1)e^{\frac{\Delta}{\tau}} \right),$$

$$N_2 = m^2 \left( e^{\frac{4p_0\Delta}{\tau}} - (m-3)e^{\frac{2\Delta}{\tau}} + (m-4)e^{\frac{\Delta+2p_0\Delta}{\tau}} \right),$$

and

$$D_1 = m^2 \left( e^{\frac{2p_0\Delta}{\tau}} + (m-1)e^{\frac{\Delta}{\tau}} \right)^2.$$

Therefore, for  $m \geq 2, p_0 > 0.5, \Delta > 0$ ,

$$PFN_1^{NN} > PFN_1^{BB} \text{ and } PFN_1^{GB} > PFN_1^{BB}.$$

Now,

$$PTN_1^{NN} - PTN_1^{BB} = N_3/D_1$$

$$PTN_1^{GB} - PTN_1^{BB} = N_4/D_1$$

where

$$N_3 = \left( e^{\frac{\Delta}{\tau}} - e^{\frac{2p_0\Delta}{\tau}} \right) \left( (2m-1)e^{\frac{2p_0\Delta}{\tau}} + (2m^2 - 4m + 1)e^{\frac{\Delta}{\tau}} \right),$$

$$N_4 = m^2 \left( e^{\frac{\Delta}{\tau}} - e^{\frac{2p_0\Delta}{\tau}} \right) \left( e^{\frac{2p_0\Delta}{\tau}} + (m-2)e^{\frac{\Delta}{\tau}} \right),$$

and  $D_1$  is defined before.

Therefore, for  $m \geq 2, p_0 > 0.5, \Delta > 0$ ,

$$PTN_1^{BB} > PTN_1^{NN} \text{ and } PTN_1^{BB} > PTN_1^{GB}.$$

**Remark 1**

$$\begin{aligned} \lim_{p_0 \rightarrow \frac{1}{2}} [PFN_1^{NN} - PFN_1^{BB}] &= \lim_{p_0 \rightarrow \frac{1}{2}} [PFN_1^{GB} - PFN_1^{BB}] \\ &= \lim_{p_0 \rightarrow \frac{1}{2}} [PTN_1^{BB} - PTN_1^{NN}] = \lim_{p_0 \rightarrow \frac{1}{2}} [PTN_1^{BB} - PTN_1^{GB}] \rightarrow 0. \end{aligned}$$

**Proof of Proposition 2:**

We need to show

$$\frac{\partial}{\partial \phi} \left[ \frac{PTP_2^{BB}}{PTP_2^{NN}} \right] > 0 \text{ and } \frac{\partial}{\partial \phi} \left[ \frac{PTP_2^{BB}}{PTP_2^{GB}} \right] > 0.$$

Let the agents pick the most likely choices in the first trial. Then the most likely outcome for the Good-Bad case is false negative, and for the Bad-Bad and No-No cases it is true negative.

Conditional on the most likely outcome in the first trial, the probability of true positive in the second trial for different cases are as follows ( $\Pi_{min} + \Delta$  is substituted for  $\Pi_{max}$ ):

$$\begin{aligned} PTP_2^{NN} &= \frac{1}{\left( m - 1 + e^{-\frac{p_0 \Delta \phi}{\tau}} \right)^2}, \\ PTP_2^{GB} &= \frac{e^{\frac{\Delta(1+p_0(2+\phi))}{\tau}}}{\left( (m-1)e^{\frac{\Delta(1+p_0\phi)}{\tau}} + e^{\frac{2p_0\Delta}{\tau}} \right)^2}, \\ PTP_2^{BB} &= \frac{e^{\frac{2\Delta(1+p_0\phi)}{\tau}}}{\left( (m-1)e^{\frac{\Delta(1+p_0\phi)}{\tau}} + e^{\frac{2p_0\Delta}{\tau}} \right)^2}. \end{aligned}$$

Now,

$$\frac{\partial}{\partial \phi} \left[ \frac{PTP_2^{BB}}{PTP_2^{NN}} \right] = \frac{2p_0\Delta(m-1)e^{\frac{\Delta(2+p_0\phi)}{\tau}} \left[ e^{\frac{2p_0\Delta}{\tau}} - e^{\frac{\Delta}{\tau}} \right] \left[ 1 + (m-1)e^{\frac{p_0\Delta\phi}{\tau}} \right]}{\tau \left[ e^{\frac{2p_0\Delta}{\tau}} + (m-1)e^{\frac{\Delta(1+p_0\phi)}{\tau}} \right]^3},$$

and

$$\frac{\partial}{\partial \phi} \left[ \frac{PTP_2^{BB}}{PTP_2^{GB}} \right] = \frac{p_0\Delta}{\tau} e^{\frac{\Delta(1+p_0(\phi-2))}{\tau}}.$$

Therefore, for  $m \geq 2, p_0 > 0.5, \Delta > 0$  and  $\tau > 0$ ,

$$\frac{\partial}{\partial \phi} \left[ \frac{PTP_2^{BB}}{PTP_2^{NN}} \right] > 0 \quad \text{and} \quad \frac{\partial}{\partial \phi} \left[ \frac{PTP_2^{BB}}{PTP_2^{GB}} \right] > 0.$$

**Remark 2** *We condition on the most likely outcome in the first trial because we assume that the probability of occurrences of other outcomes is negligible. It is easy to show that Proposition 2 holds even if we do not assume that the probability of false negative in the first trial for the No-No case is negligible.*

**Remark 3**  $PTP_2^{BB}|_{\phi'} = PTP_2^{GB}|_{\phi'}$  for  $\phi' = \frac{2p_0-1}{p_0}$ . For all  $\phi > \phi'$ ,  $PTP_2^{BB} > PTP_2^{GB}$ .
